# Supplementary material for: NIR-II fluorescence-guided liver cancer surgery by a small molecular HDAC6 targeting probe
Source: PubMed Central journal article supplement — eBioMedicine. 2023 Nov 29;98:104880. doi: 10.1016/j.ebiom.2023.104880 (PMC10698675; doi:10.1016/j.ebiom.2023.104880), 2023-11-29
Supplement: mmc3.pdf [file mmc3.pdf]

# 细胞遗传质量鉴定检测

## Cell Line Authentication Service

### STR 基因型检测报告

## 样品信息

样品编号:

| 客户样本编号 | 公司编号        |
|--------|-------------|
| 12     | 20170602-02 |

样品数量: 1

样品性状: 细胞系

检测项目: STR

送检单位: 北纳生物

检测方法: 用 Axygen 的基因组抽提试剂盒提取 DNA, 采用 20- STR 扩增方案扩增, 在 ABI 3730XL 型遗传分析仪上对 STR 位点和性别基因 Amelogenin 进行检测。

# 检测结果

## (一) 检验基本情况

|             | 多等位基因 | 匹配细胞系 | 细胞库  | EV 值 | 匹配说明 |
|-------------|-------|-------|------|------|------|
| 20170602-02 | 无     |       | DSMZ |      | 无    |

### 样本基因型检验结果

- 多等位基因指三等位及以上基因现象。
- 本次检测各细胞分型结果良好。

## (二) 各样本描述

(三)20170602-02: 该株细胞 DNA 分型在细胞系检索中**没有找到匹配**的细胞系, 本次检测在该细胞系中**没有发现多等位基因**。(该细胞系L 02未发现发现多等位基因、未发现交叉 污染, 细胞系本身无异常, 因数据库未登录相 STR 信息, 无法匹配, 若为发表 论文计 可提交该数据给杂志即可)

**备注:** 待测细胞系与收录于 ATCC, DSMZ, JCRB 和 RIKEN 数据库的细胞系 STR 数据进行比对, 未收录于以上细胞库的细胞系将无法匹配。

### (三) 样本分型结果

表 2：细胞 20170602-02 的 STR 位点和 Amelogenin 位点的基因分型结果

| Marker  | 样本      |         |         |         | 细胞库信息   |         |         |
|---------|---------|---------|---------|---------|---------|---------|---------|
|         | Allele1 | Allele2 | Allele3 | Allele4 | Allele1 | Allele2 | Allele3 |
| D5S818  | 11      | 12      |         |         |         |         |         |
| D13S317 | 13.3    | 13.3    |         |         |         |         |         |
| D7S820  | 12      | 12      |         |         |         |         |         |
| D16S539 | 9       | 10      |         |         |         |         |         |
| VWA     | 16      | 16      |         |         |         |         |         |
| TH01    | 7       | 7       |         |         |         |         |         |
| AMEL    | X       | X       |         |         |         |         |         |
| TPOX    | 12      | 12      |         |         |         |         |         |
| CSF1PO  | 10      | 10      |         |         |         |         |         |
| D12S391 | 20      | 20      |         |         |         |         |         |
| FGA     | 18      | 21      |         |         |         |         |         |
| D2S1338 | 17      | 17      |         |         |         |         |         |
| D21S11  | 27      | 28      |         |         |         |         |         |
| D18S51  | 16      | 16      |         |         |         |         |         |
| D8S1179 | 12      | 12      |         |         |         |         |         |
| D3S1358 | 15      | 18      |         |         |         |         |         |
| D6S1043 | 18      | 18      |         |         |         |         |         |
| PENTAE  | 7       | 17      |         |         |         |         |         |
| D19S433 | 13      | 13      |         |         |         |         |         |
| PENTAD  | 8       | 15      |         |         |         |         |         |

## 其他说明

### (一) 分型方案及位点分布

|   | 方案 1    | 方案 2    | 方案 3    | 方案 4    |
|---|---------|---------|---------|---------|
| 1 | TH01    | TPOX    | D3S1358 | AMEL    |
| 2 | D12S391 | VWA     | D13S317 | D5S818  |
| 3 | D7S820  | D8S1179 | D6S1043 | D2S1338 |
| 4 | CSF1PO  | PENTAD  | D16S539 | D21S11  |
| 5 | FGA     |         | D19S433 | D18S51  |
| 6 | PENTAE  |         |         |         |

## **(二) STR 数据库比对**

本公司采用 DSMZ tools 进行细胞系比对，其中包含来自于 ATCC, DSMZ, JCRB 和 RIKEN 数据库的 2455 个细胞系 STR 数据。如果待检测细胞未收录于以上细胞库或这是自行建立的新细胞系将无法进行比对，用户需根据细胞分型结果自行与其他数据库进行比对。

**签发日期：** 2017 年 6 月 12 日

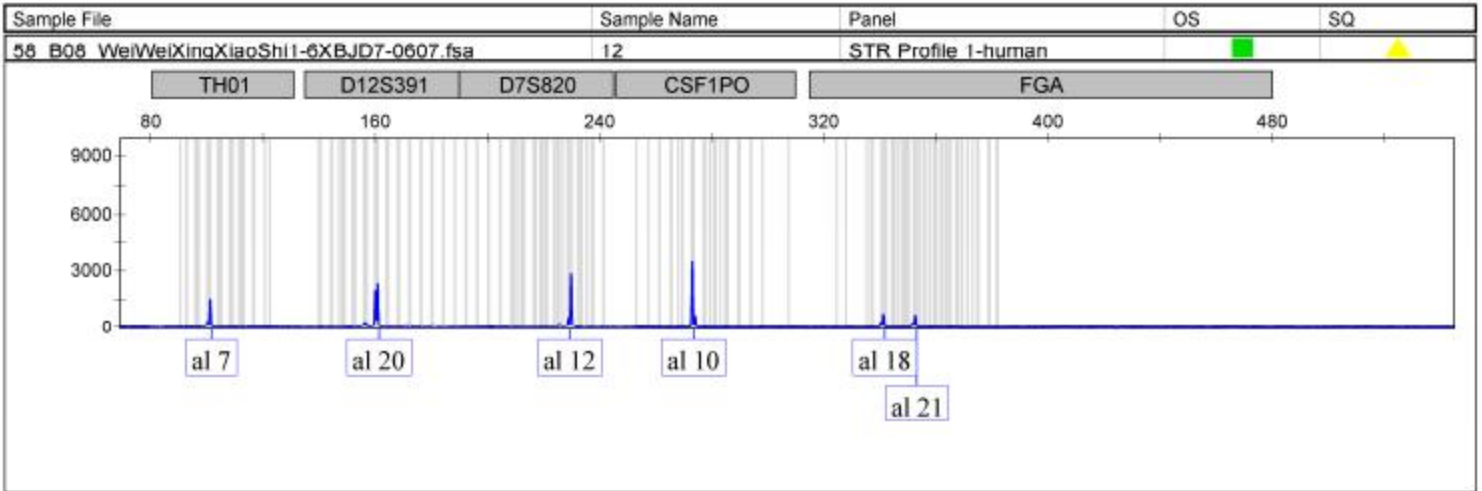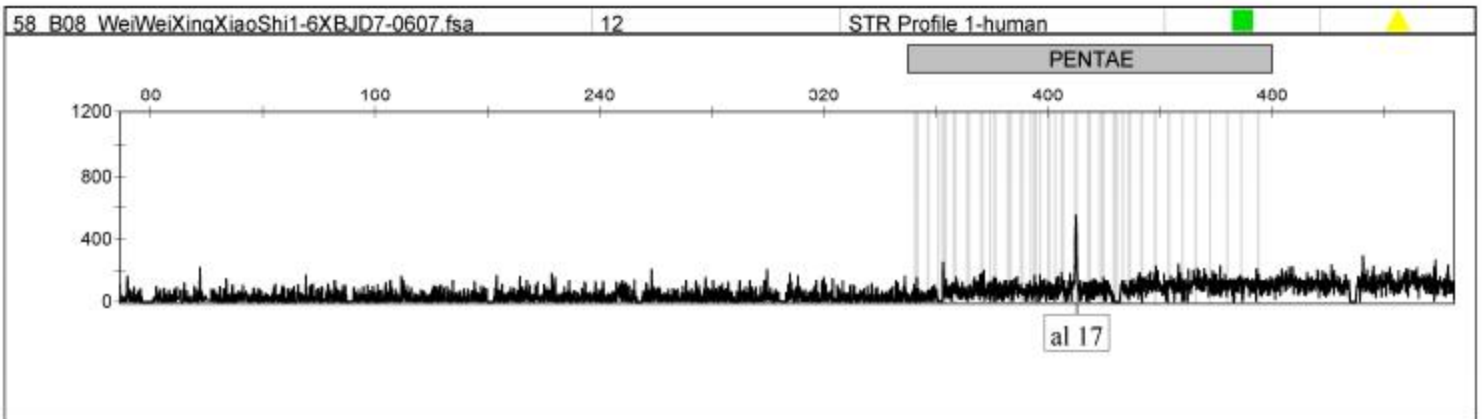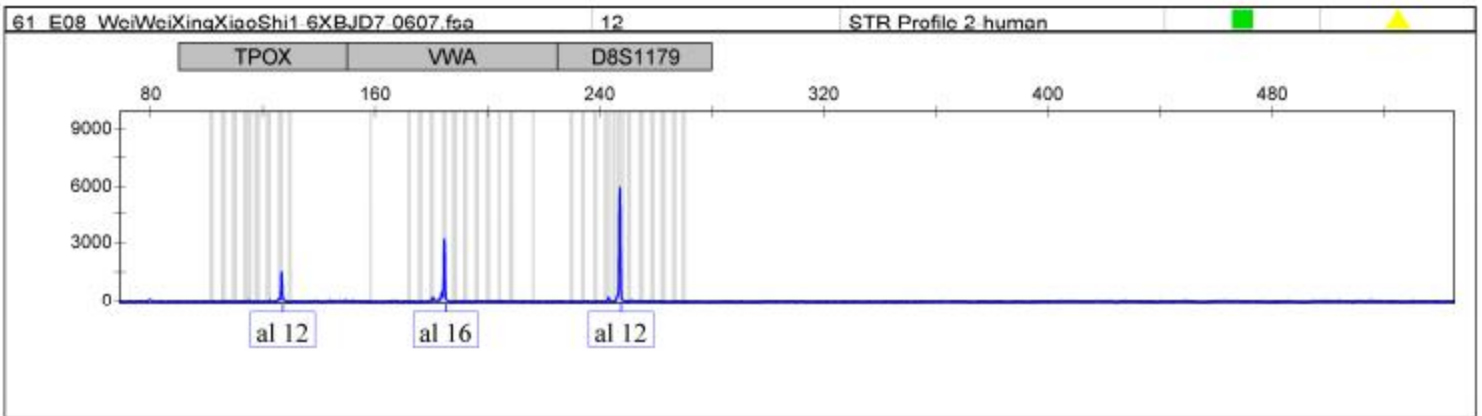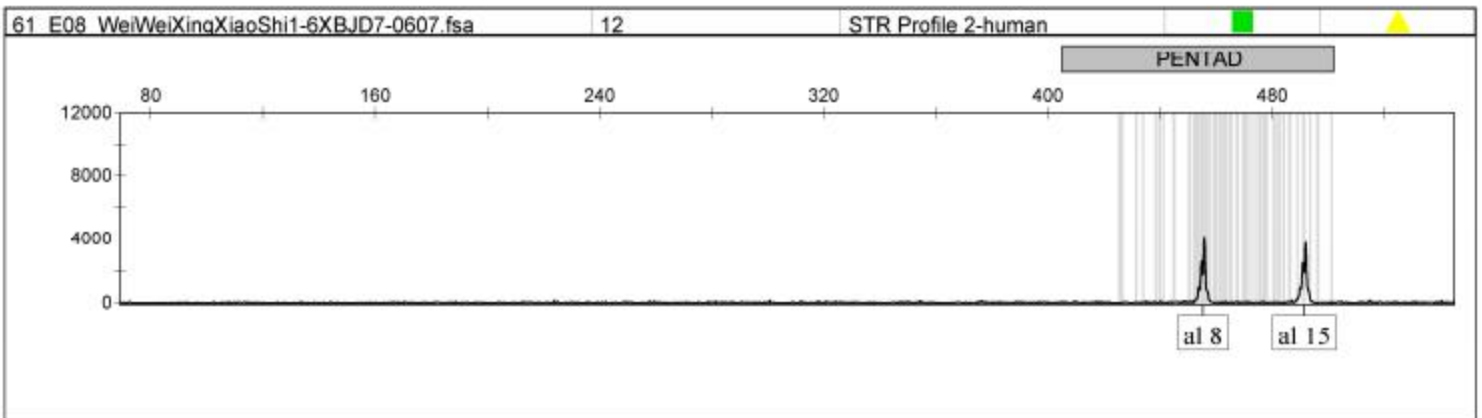

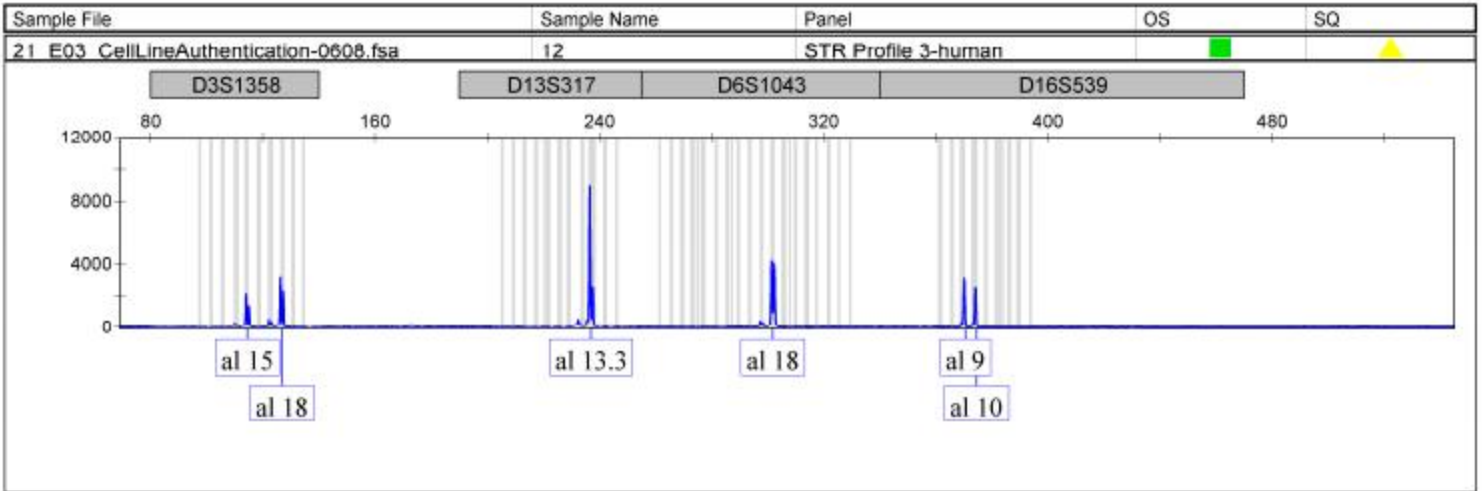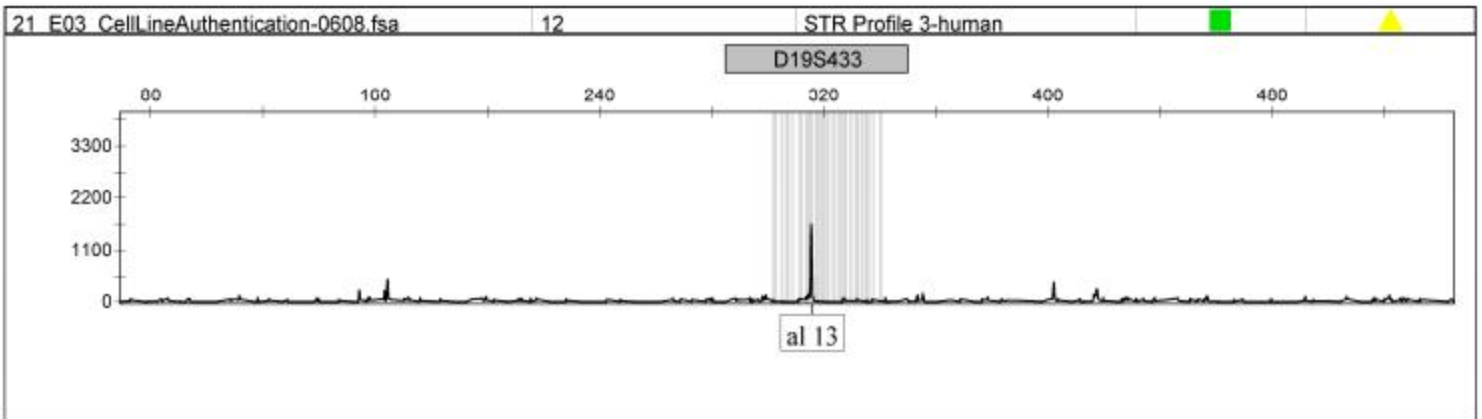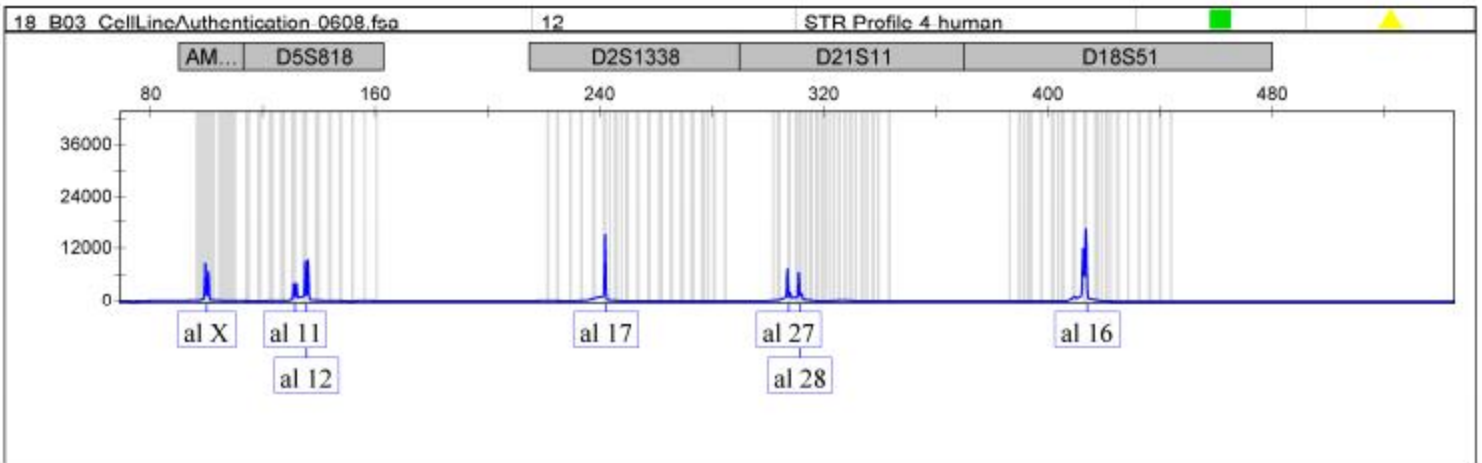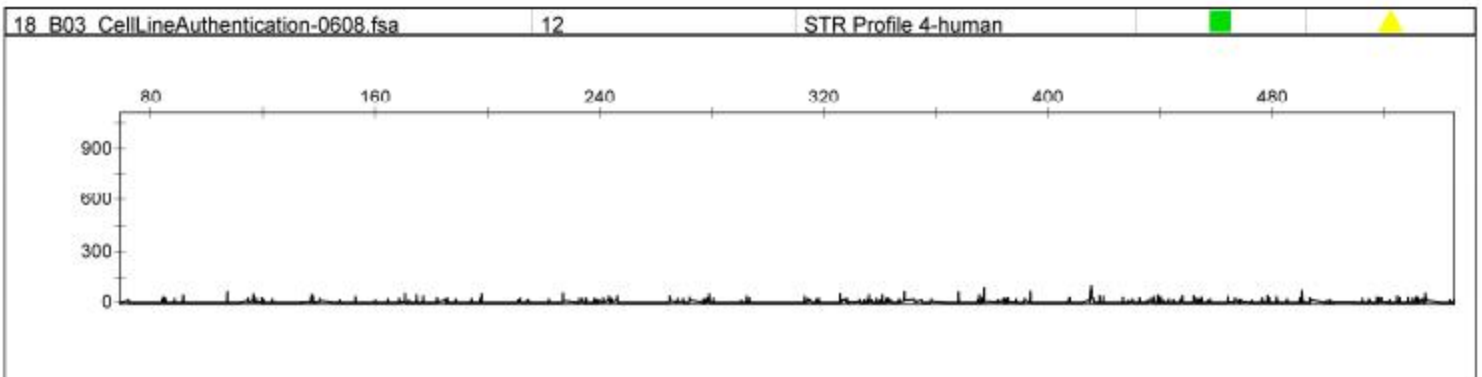

## PLC/PRF/5细胞STR鉴定报告

### 一、 材料处理和检验方法

取适量PLC/PRF/5细胞(编号PC-H2022081814,  $1 \times 10^6$ )使用Microread Genomic DNA Kit提取DNA, 采用Microreader™21 ID System扩增20个STR位点和性别鉴定位点, 使用智阅基因分析仪GenReader 7010进行PCR产物检测, 使用GeneMapper Software6软件(Applied Biosystems)对检测结果进行分析, 并与ATCC、DSMZ、JCRB、ExPASy等数据库进行比对。

### 二、 检测结果

实验中阴性及阳性对照结果均正确。

PLC/PRF/5细胞株的STR位点和Amelogenin位点的基因分型结果见附表, 分型图谱见附图。

### 三、 分析说明

PLC/PRF/5细胞株基因组DNA扩增后图谱清晰, 分型结果良好。

### 四、 检验结论

1. PLC/PRF/5细胞株DNA进行细胞STR分型结果显示, 细胞株中未发现人类细胞交叉污染。
2. 该细胞株DNA分型在细胞库中找到与其细胞分型98.51%相匹配的细胞株, 细胞株名称为PLC/PRF/5。

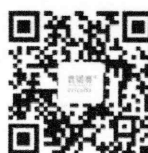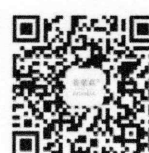

附表1: 细胞株PLC/PRF/5的STR位点和Amelogenin位点的基因分型结果

| STR Loci                                                                                                                                    | 样品名称: PC-H2022081814 | 数据库名称: PLC/PRF/5 |
|---------------------------------------------------------------------------------------------------------------------------------------------|----------------------|------------------|
| Amelogenin                                                                                                                                  | X                    | X                |
| CSF1PO                                                                                                                                      | 10                   | 10               |
| D2S1338                                                                                                                                     | 19,22                | 19,22            |
| D3S1358                                                                                                                                     | 15                   | 15               |
| D5S818                                                                                                                                      | 12                   | 12               |
| D7S820                                                                                                                                      | 9,11                 | 9,11             |
| D8S1179                                                                                                                                     | 13,14,16             | 13,16            |
| D13S317                                                                                                                                     | 11,12                | 11,12            |
| D16S539                                                                                                                                     | 13                   | 13               |
| D18S51                                                                                                                                      | 17                   | 17               |
| D19S433                                                                                                                                     | 11,13                | 11,13            |
| D21S11                                                                                                                                      | 30,33.2              | 30,33.2          |
| FGA                                                                                                                                         | 19.2,25              | 19.2,25          |
| PentaD                                                                                                                                      | 6,10                 | 6,10             |
| PentaE                                                                                                                                      | 10,16                | 10,16            |
| TH01                                                                                                                                        | 8                    | 8                |
| TPOX                                                                                                                                        | 8                    | 8                |
| vWA                                                                                                                                         | 15,16                | 15,16            |
| D6S1043                                                                                                                                     | 13,21                | 13,21            |
| D12S391                                                                                                                                     | 15,20                | 15,20            |
| D2S441                                                                                                                                      | 12,14                | 12,14            |
| ExPASy数据库匹配度98.51%, 匹配位点数20 ( <a href="https://web.expasy.org/cellosaurus-str-search/">https://web.expasy.org/cellosaurus-str-search/</a> ) |                      |                  |

备注:

1. 根据国际细胞鉴定委员会(ICLAC)制定的细胞 STR 鉴定标准, 细胞系的匹配度 $\geq 80\%$  时, 认为它们具有相关性, 即衍生于共同的祖先细胞; 匹配度在 55% 至 80% 之间, 需要进一步验证相关性; 小于 55%, 表明两者不具有相关性。
2. 图谱有效峰为真实的 PCR 条带; 小峰和非特异性条带在计算中忽略不计。
3. STR 数据比对结果默认 ExPASy, 数据来源包括 ATCC, DSMZ, JCRB 等细胞库以及文献和资料记载, 数据库入口 <https://web.expasy.org/cellosaurus-str-search/>。

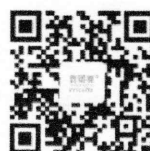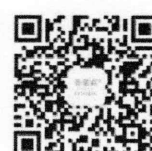



附图1: PLC/PRF/5细胞STR位点和Amelogenin位点的基因分型结果。

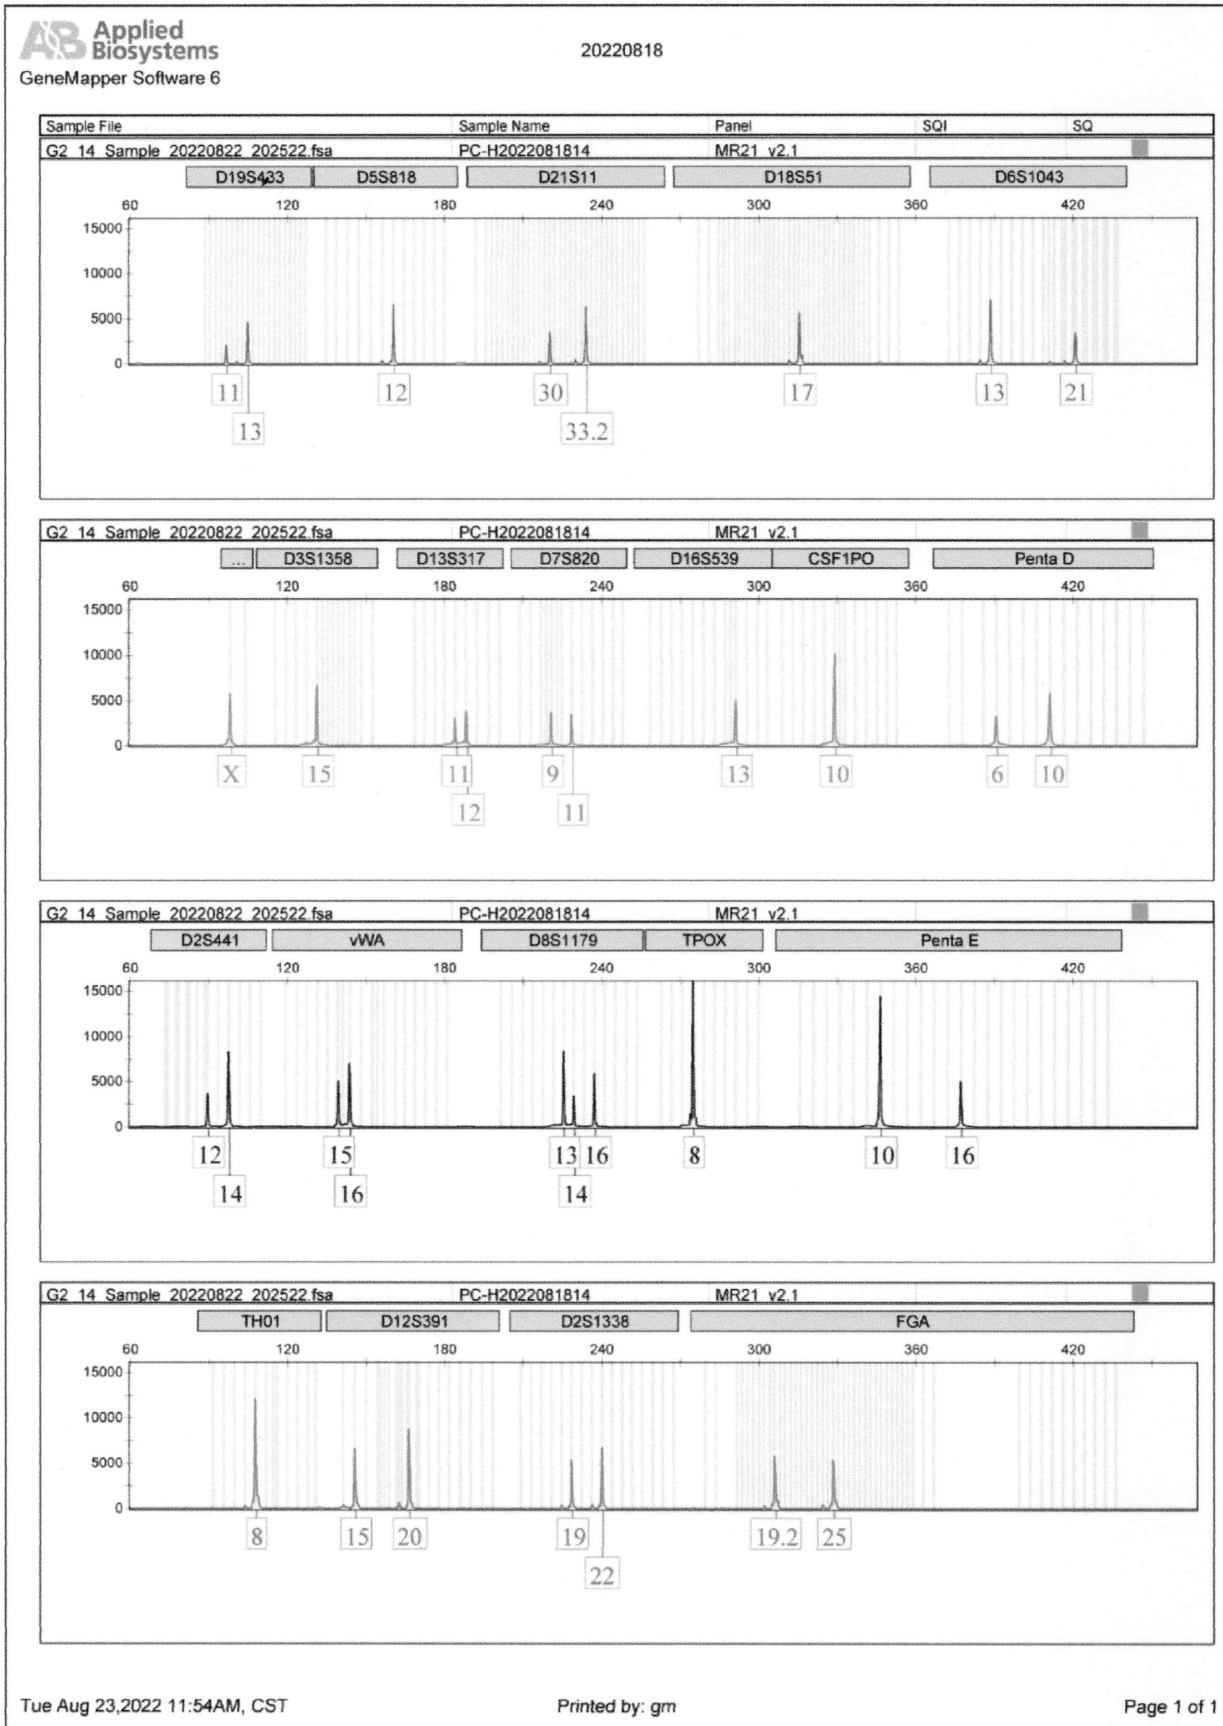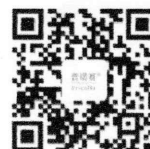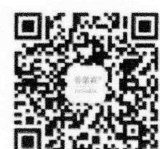

# 细胞遗传质量鉴定检测

## Cell Line Authentication Service

### STR 基因型检测报告 样品信息

样品编号:

| 客户样本编号 | 公司编号        |
|--------|-------------|
| HEPG2  | 20200621-01 |

样品数量: 1

样品性状: 细胞系

检测项目: STR

送检单位: 北纳生物

**检测方法：**用 Axygen 的基因组抽提试剂盒提取 DNA，采用 21- STR 扩增方案扩增，在 ABI 3730XL 型遗传分析仪上对 STR 位点和性别基因 Amelogenin 进行检测。

# 检测结果

## (一) 检验基本情况

| 样本编号  | 公司编号        | 多等位基因 | 匹配细胞系  | 细胞库  | EV 值 | 匹配说明 |
|-------|-------------|-------|--------|------|------|------|
| HEPG2 | 20200621-01 | 无     | HEP-G2 | DSMZ | 0.97 | 基本匹配 |

样本基因型检验结果

- 多等位基因指三等位及以上基因现象。
- 本次检测各细胞分型结果良好。

## (二) 各样本描述

- 20200621-01：该株细胞 DNA 分型在细胞系检索中找到基本匹配的细胞系，DSMZ 数据库显示细胞名为 HEP-G2，细胞号对应 ACC-180。本次检测在该细胞系中没有发现多等位基因。

备注：待测细胞系与收录于 ATCC, DSMZ, JCRB 和 RIKEN 数据库的细胞系 STR 数据进行比对，未收录于以上细胞库的细胞系将无法匹配。

### (三) 样本分型结果

| 细胞的 STR 位点和 Amelogenin 位点的基因分型结果 |              |         |         |                |         |         |
|----------------------------------|--------------|---------|---------|----------------|---------|---------|
| Loci                             | 送检细胞 STR 信息  |         |         | 细胞库细胞 STR 信息   |         |         |
|                                  | 送检细胞名: HEPG2 |         |         | 细胞库细胞名: HEP-G2 |         |         |
|                                  | Allele1      | Allele2 | Allele3 | Allele1        | Allele2 | Allele3 |
| D5S818                           | 11           | 12      |         | 11             | 12      |         |
| D13S317                          | 9            | 13      |         | 9              | 13      |         |
| D7S820                           | 10           | 10      |         | 10             | 10      |         |
| D16S539                          | 12           | 12      |         | 12             | 13      |         |
| VWA                              | 17           | 17      |         | 17             | 17      |         |
| TH01                             | 9            | 9       |         | 9              | 9       |         |
| AMEL                             | X            | Y       |         | X              | Y       |         |
| TPOX                             | 8            | 9       |         | 8              | 9       |         |
| CSF1 PO                          | 10           | 11      |         | 10             | 11      |         |
| D12S391                          | 21           | 25      |         |                |         |         |
| FGA                              | 22           | 25      |         |                |         |         |
| D2S1338                          | 19           | 20      |         |                |         |         |
| D21S11                           | 29           | 31      |         |                |         |         |
| D18S51                           | 13           | 14      |         |                |         |         |
| D8S1179                          | 15           | 16      |         |                |         |         |
| D3S1358                          | 15           | 16      |         |                |         |         |
| D6S1043                          | 13           | 13      |         |                |         |         |
| PENTAE                           | 15           | 20      |         |                |         |         |
| D19S433                          | 15.2         | 15.2    |         |                |         |         |
| PENTAD                           | 9            | 13      |         |                |         |         |
| D1S1656                          | 11           | 12      |         |                |         |         |

# 其他说明

## (一) 分型方案及位点分布

|   | 方案 1    | 方案 2    | 方案 3    | 方案 4    |
|---|---------|---------|---------|---------|
| 1 | D3S1358 | D8S1179 | D19S433 | AMEL    |
| 2 | VWA     | D21S11  | TH01    | D1S1656 |
| 3 | D7S820  | D16S539 | D13S317 | D5S818  |
| 4 | CSF1 PO | D2S1338 | TPOX    | D12S391 |
| 5 | PENTAE  | PENTAD  | D18S51  | FGA     |
| 6 |         |         | D6S1043 |         |

实验方案及位点

## (二) STR 数据库比对

本公司采用 DSMZ tools 进行细胞系比对，其中包含来自于 ATCC, DSMZ, JCRB 和 RIKEN 数据库的 2455 个细胞系 STR 数据。如果待检测细胞未收录于以上细胞库或这是自行建立的新细胞系将无法进行比对，用户需根据细胞分型结果自行与其他数据库进行比对。

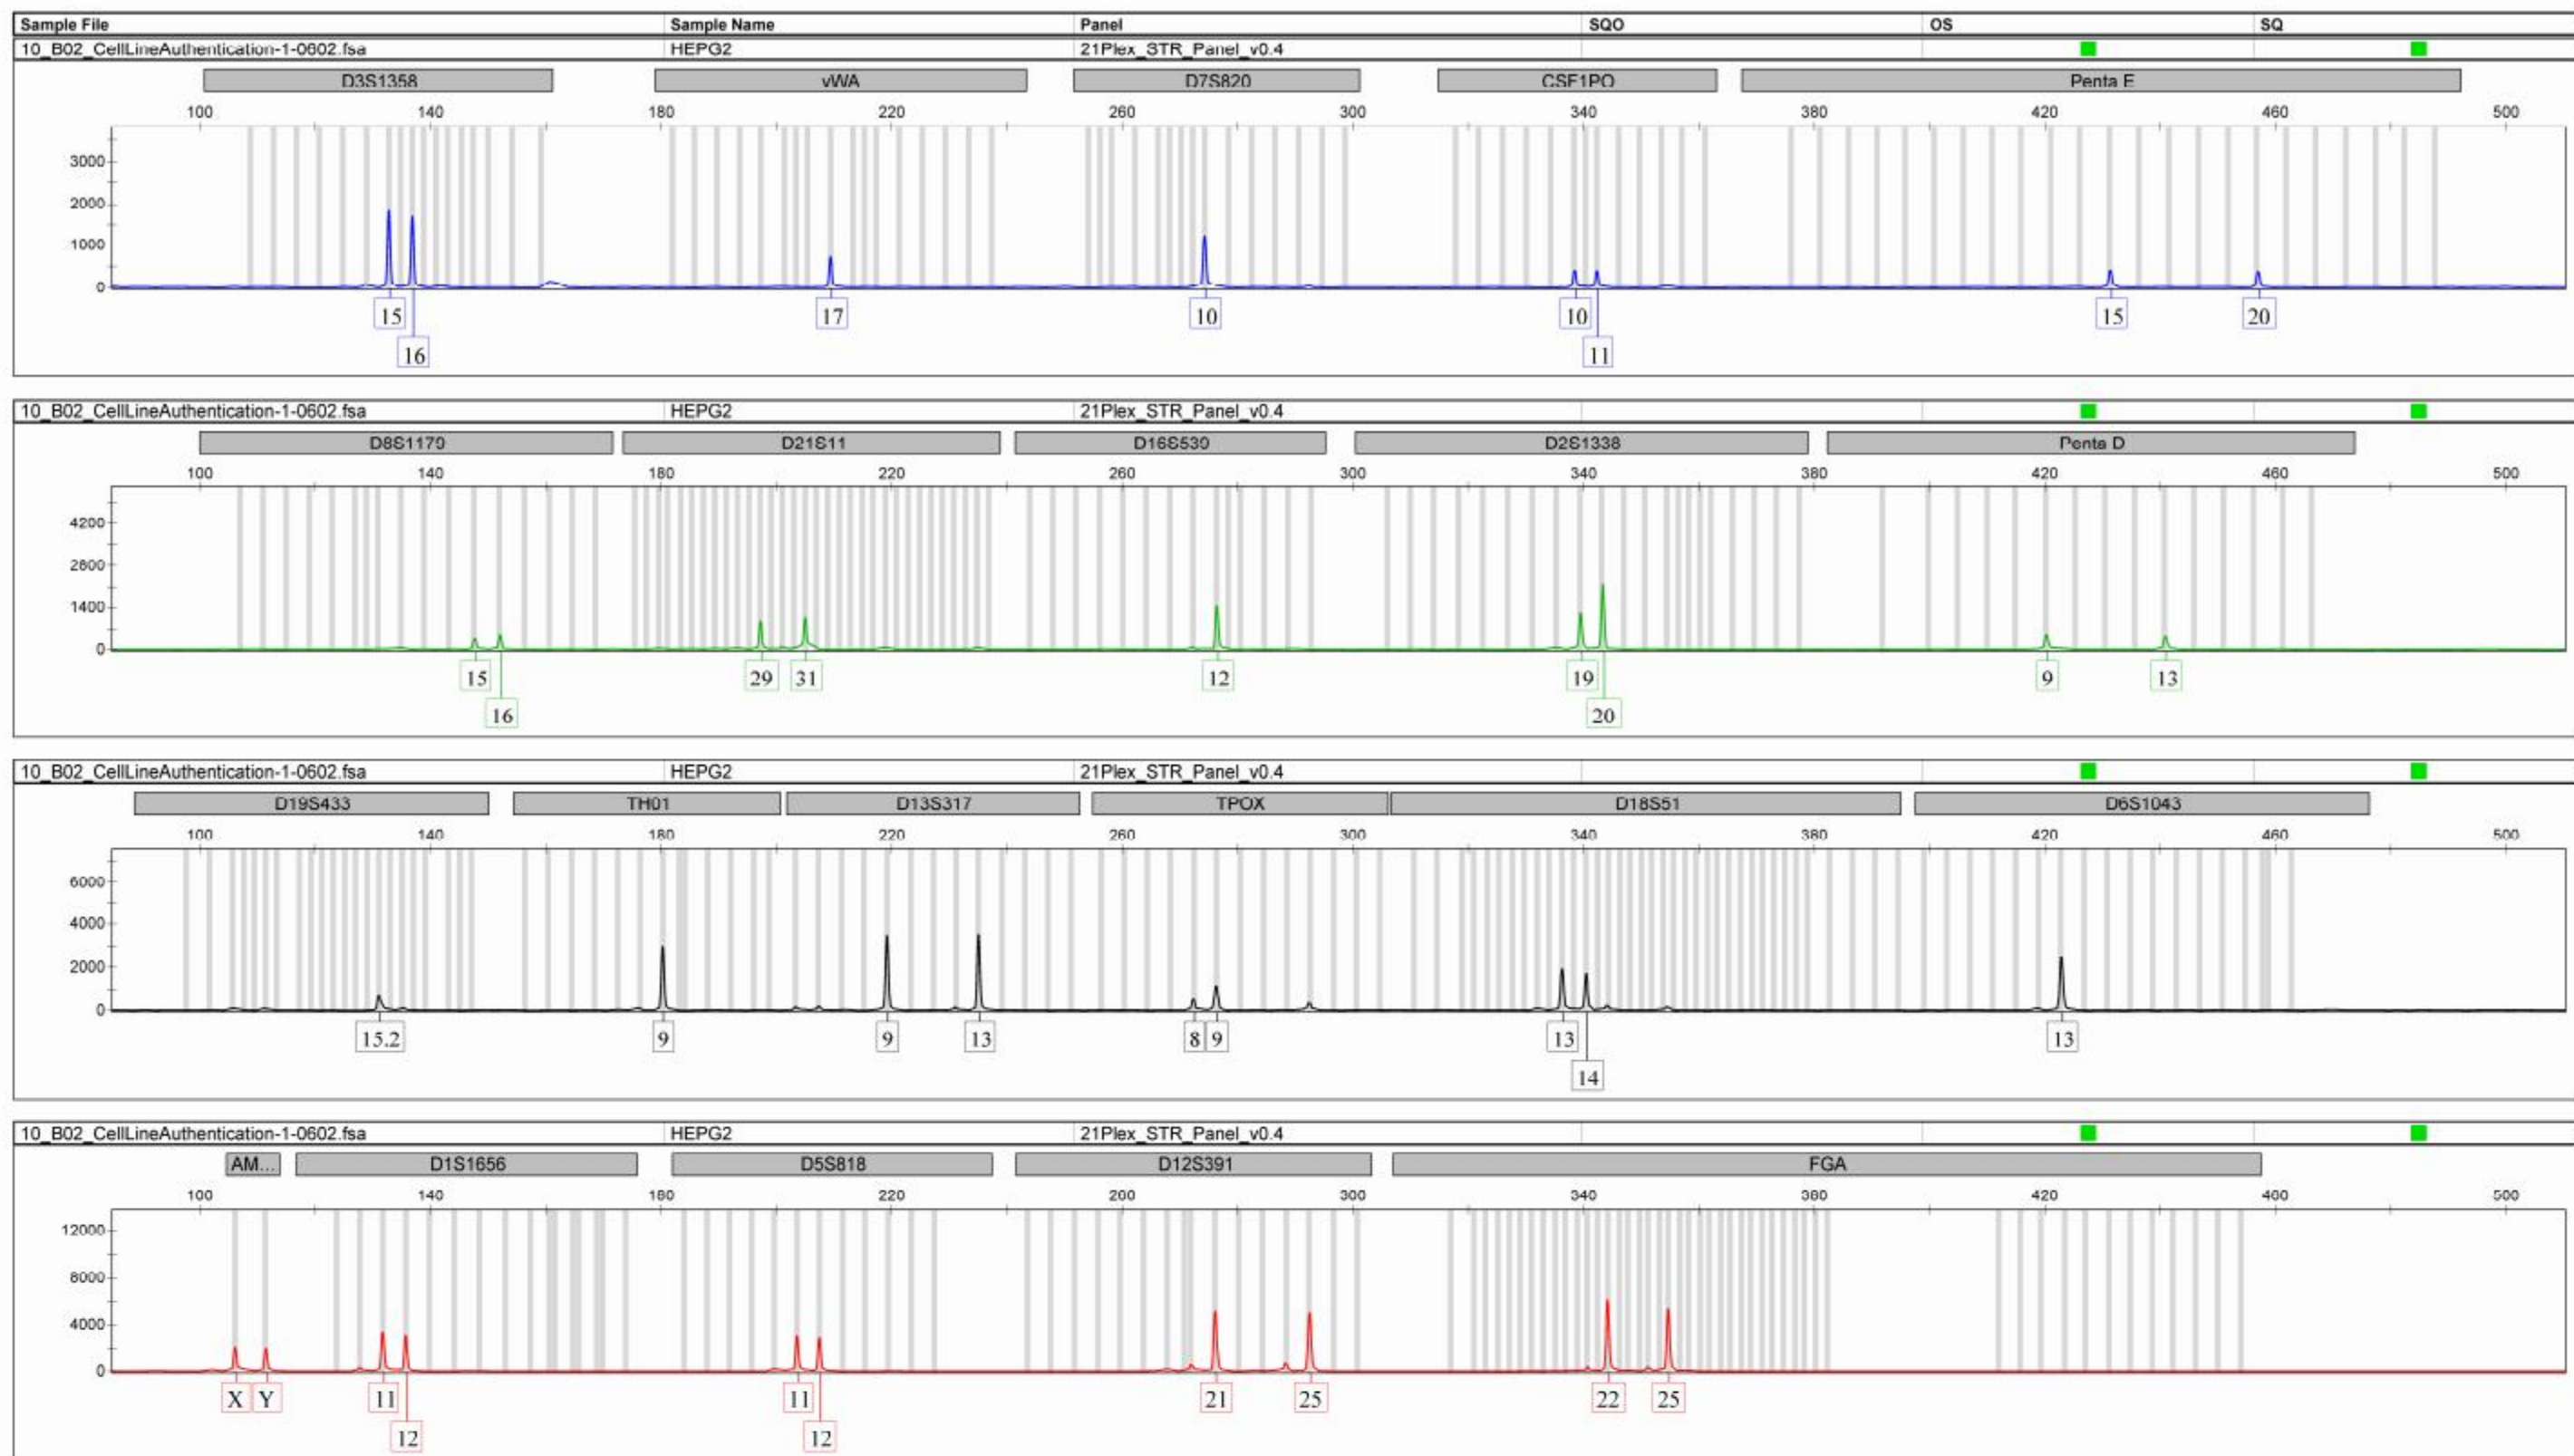

## HCCLM3 细胞 STR 鉴定报告

### 一、材料处理和检测方法

取适量细胞 ( $> 1 \times 10^6$ )，使用 Biospin 细胞基因组 DNA 提取试剂盒 (货号 BSC05) 提取细胞的基因组 DNA。使用滨会生物的人源 STR 位点检测试剂盒 (货号 BHRD008) 对 20 个 STR 位点以及性别位点 Amelogenin 进行扩增。使用 Cellosaurus STR 相似度搜索工具 CLASTR 对检测数据进行分析，同时与 ATCC, DSMZ, JCRB 和 RIKEN 等多个细胞库以及文献资料进行比对。

### 二、检验结果

| 样品编号   | 多等位基因 | 匹配细胞系  | 细胞库         | 匹配度    | 匹配说明 |
|--------|-------|--------|-------------|--------|------|
| HCCLM3 | 无     | HCCLM3 | cellosaurus | 0.9520 | 基本匹配 |

- 多等位基因指三等位及以上基因现象。

### 三、鉴定结论:

- 1、本次检测各细胞分型结果良好。
- 2、该细胞株 DNA 分型在细胞库中匹配到与其细胞分型 **95.20%**相匹配的细胞株，细胞株名为：**HCCLM3**。

### 备注:

- 1、根据国际细胞鉴定委员会 (ICLAC) 制定的细胞 STR 鉴定标准，当细胞系匹配度为 1.00 时是完全匹配；匹配度在 0.80 到 0.99 之间时认定检测细胞与细胞库里匹配到的细胞具有相关性；但当匹配度小于 0.80 时表明检测细胞与细胞库里匹配到的细胞 STR 位点差异较大，两者之间没有关联，不能对检测细胞进行鉴定。
- 2、STR 比对结果默认 CLASTR，服务器公开访问地址 (<https://www.cellosaurus.org/str-search/>)。

附表：HCCLM3 细胞的 STR 位点和 Amelogenin 位点的基因分型结果

| Loci    | 送检 HCCLM3 样品 STR 信息 |     |     | 细胞库 HCCLM3 细胞 STR 信息 |      |     |
|---------|---------------------|-----|-----|----------------------|------|-----|
|         | AL1                 | AL2 | AL3 | AL1                  | AL2  | AL3 |
| Amel    | X                   | Y   |     | X                    | Y    |     |
| D3S1358 | 15                  | 16  |     |                      |      |     |
| TH01    | 9                   |     |     | 9                    |      |     |
| D21S11  | 31.2                |     |     |                      |      |     |
| D18S51  | 13                  | 22  |     |                      |      |     |
| Penta E | 17                  |     |     |                      |      |     |
| D5S818  | 12                  | 13  |     | 12                   | 13   |     |
| D13S317 | 8                   |     |     | 8                    | 11.3 |     |
| D7S820  | 10                  |     |     | 10                   |      |     |
| D16S539 | 12                  |     |     | 12                   |      |     |
| CSFIPO  | 11                  | 13  |     | 11                   | 13   |     |
| Penta D | 8                   | 9   |     |                      |      |     |
| vWA     | 14                  |     |     | 14                   |      |     |
| D8S1179 | 12                  | 13  |     |                      |      |     |
| TPOX    | 8                   |     |     | 8                    |      |     |
| FGA     | 21                  | 24  |     |                      |      |     |
| D19S433 | 13                  | 14  |     |                      |      |     |
| D12S391 | 18                  |     |     |                      |      |     |
| D6S1043 | 12                  | 20  |     |                      |      |     |
| D2S1338 | 20                  |     |     |                      |      |     |
| D1S1656 | 11                  | 16  |     |                      |      |     |

鉴定日期：2023-08-02

附图：HCCLM3 细胞的 STR 位点和 Amelogenin 位点的基因分型结果

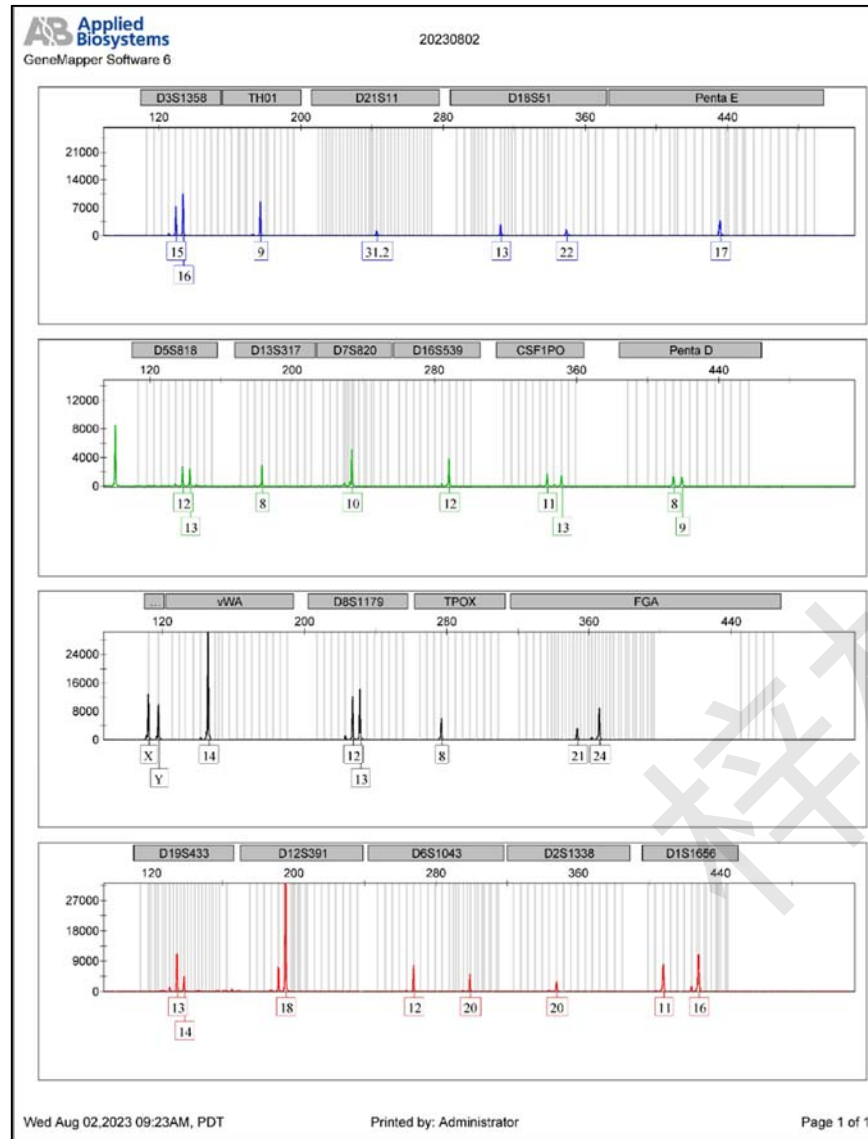



# 细胞遗传质量鉴定检测

## Cell Line Authentication Service

### STR 基因型检测报告

## 样品信息

样品编号:

| 客户样本编号 | 公司编号        |
|--------|-------------|
| HUH-7  | 20200601-01 |

样品数量: 1

样品性状: 细胞系

检测项目: STR

送检单位: 北纳生物

**检测方法：**用 Axgen 的基因组抽提试剂盒提取 DNA，采用 21- STR 扩增方案扩增，在 ABI 3730XL 型遗传分析仪上对 STR 位点和性别基因 Amelogenin 进行检测。

# 检测结果

## (一) 检验基本情况

| 公司编号        | 多等位基因 | 匹配细胞系 | 细胞库  | EV 值 | 匹配说明 |
|-------------|-------|-------|------|------|------|
| 20200601-01 | 无     | HUH-7 | DSMZ | 1.0  | 完全匹配 |

样本基因型检验结果

- 多等位基因指三等位及以上基因现象。
- 本次检测各细胞分型结果良好。

## (二) 各样本描述

- 20200601-01：该株细胞 DNA 分型在细胞系检索中找到**完全匹配**的细胞系，DSMZ 数据库显示细胞名为 **HUH-7**，细胞号对应 **JCRB0304**。本次检测在该细胞系中**没有发现多等位基因**。

**备注：**待测细胞系与收录于 ATCC, DSMZ, JCRB 和 RIKEN 数据库的细胞系 STR 数据进行比对，未收录于以上细胞库的细胞系将无法匹配。

## (三) 样本分型结果

| 细胞的 STR 位点和 Amelogenin 位点的基因分型结果 |             |         |         |              |         |         |
|----------------------------------|-------------|---------|---------|--------------|---------|---------|
| Loci                             | 送检细胞 STR 信息 |         |         | 细胞库细胞 STR 信息 |         |         |
|                                  | 送检细胞名：HUH-7 |         |         | 细胞库细胞名：HUH-7 |         |         |
|                                  | Allele1     | Allele2 | Allele3 | Allele1      | Allele2 | Allele3 |
| D5S818                           | 12          | 12      |         | 12           | 12      |         |
| D13S317                          | 10          | 11      |         | 10           | 11      |         |
| D7S820                           | 11          | 11      |         | 11           | 11      |         |

|         |    |    |  |    |    |  |
|---------|----|----|--|----|----|--|
| D16S539 | 10 | 10 |  | 10 | 10 |  |
| VWA     | 16 | 18 |  | 16 | 18 |  |
| TH01    | 7  | 7  |  | 7  | 7  |  |
| AMEL    | X  | Y  |  | X  | Y  |  |
| TPOX    | 8  | 11 |  | 8  | 11 |  |
| CSF1PO  | 11 | 11 |  | 11 | 11 |  |
| D12S391 | 20 | 21 |  |    |    |  |
| FGA     | 22 | 24 |  |    |    |  |
| D2S1338 | 19 | 19 |  |    |    |  |
| D21S11  | 30 | 30 |  |    |    |  |
| D18S51  | 15 | 15 |  |    |    |  |
| D8S1179 | 14 | 15 |  |    |    |  |
| D3S1358 | 15 | 15 |  |    |    |  |
| D6S1043 | 13 | 15 |  |    |    |  |
| PENTAE  | 11 | 11 |  |    |    |  |
| D19S433 | 13 | 14 |  |    |    |  |
| PENTAD  | 12 | 12 |  |    |    |  |

## 其他说明

### (一) 分型方案及位点分布

|   | 方案 1    | 方案 2    | 方案 3    | 方案 4    |
|---|---------|---------|---------|---------|
| 1 | D3S1358 | D8S1179 | D19S433 | AMEL    |
| 2 | VWA     | D21S11  | TH01    | D1S1656 |
| 3 | D7S820  | D16S539 | D13S317 | D5S818  |
| 4 | CSF1PO  | D2S1338 | TPOX    | D12S391 |
| 5 | PENTAE  | PENTAD  | D18S51  | FGA     |
| 6 |         |         | D6S1043 |         |

## 实验方案及位点

### (二) STR 数据库比对

本公司采用 DSMZ tools 进行细胞系比对，其中包含来自于 ATCC, DSMZ, JCRB 和 RIKEN 数据库的 2455 个细胞系 STR 数据。如果待检测细胞未收录于以上细胞库或这是自行建立的新细胞系将无法进行比对，用户需根据细胞分型结果自行与其他数据库进行比对。

2020-06-08

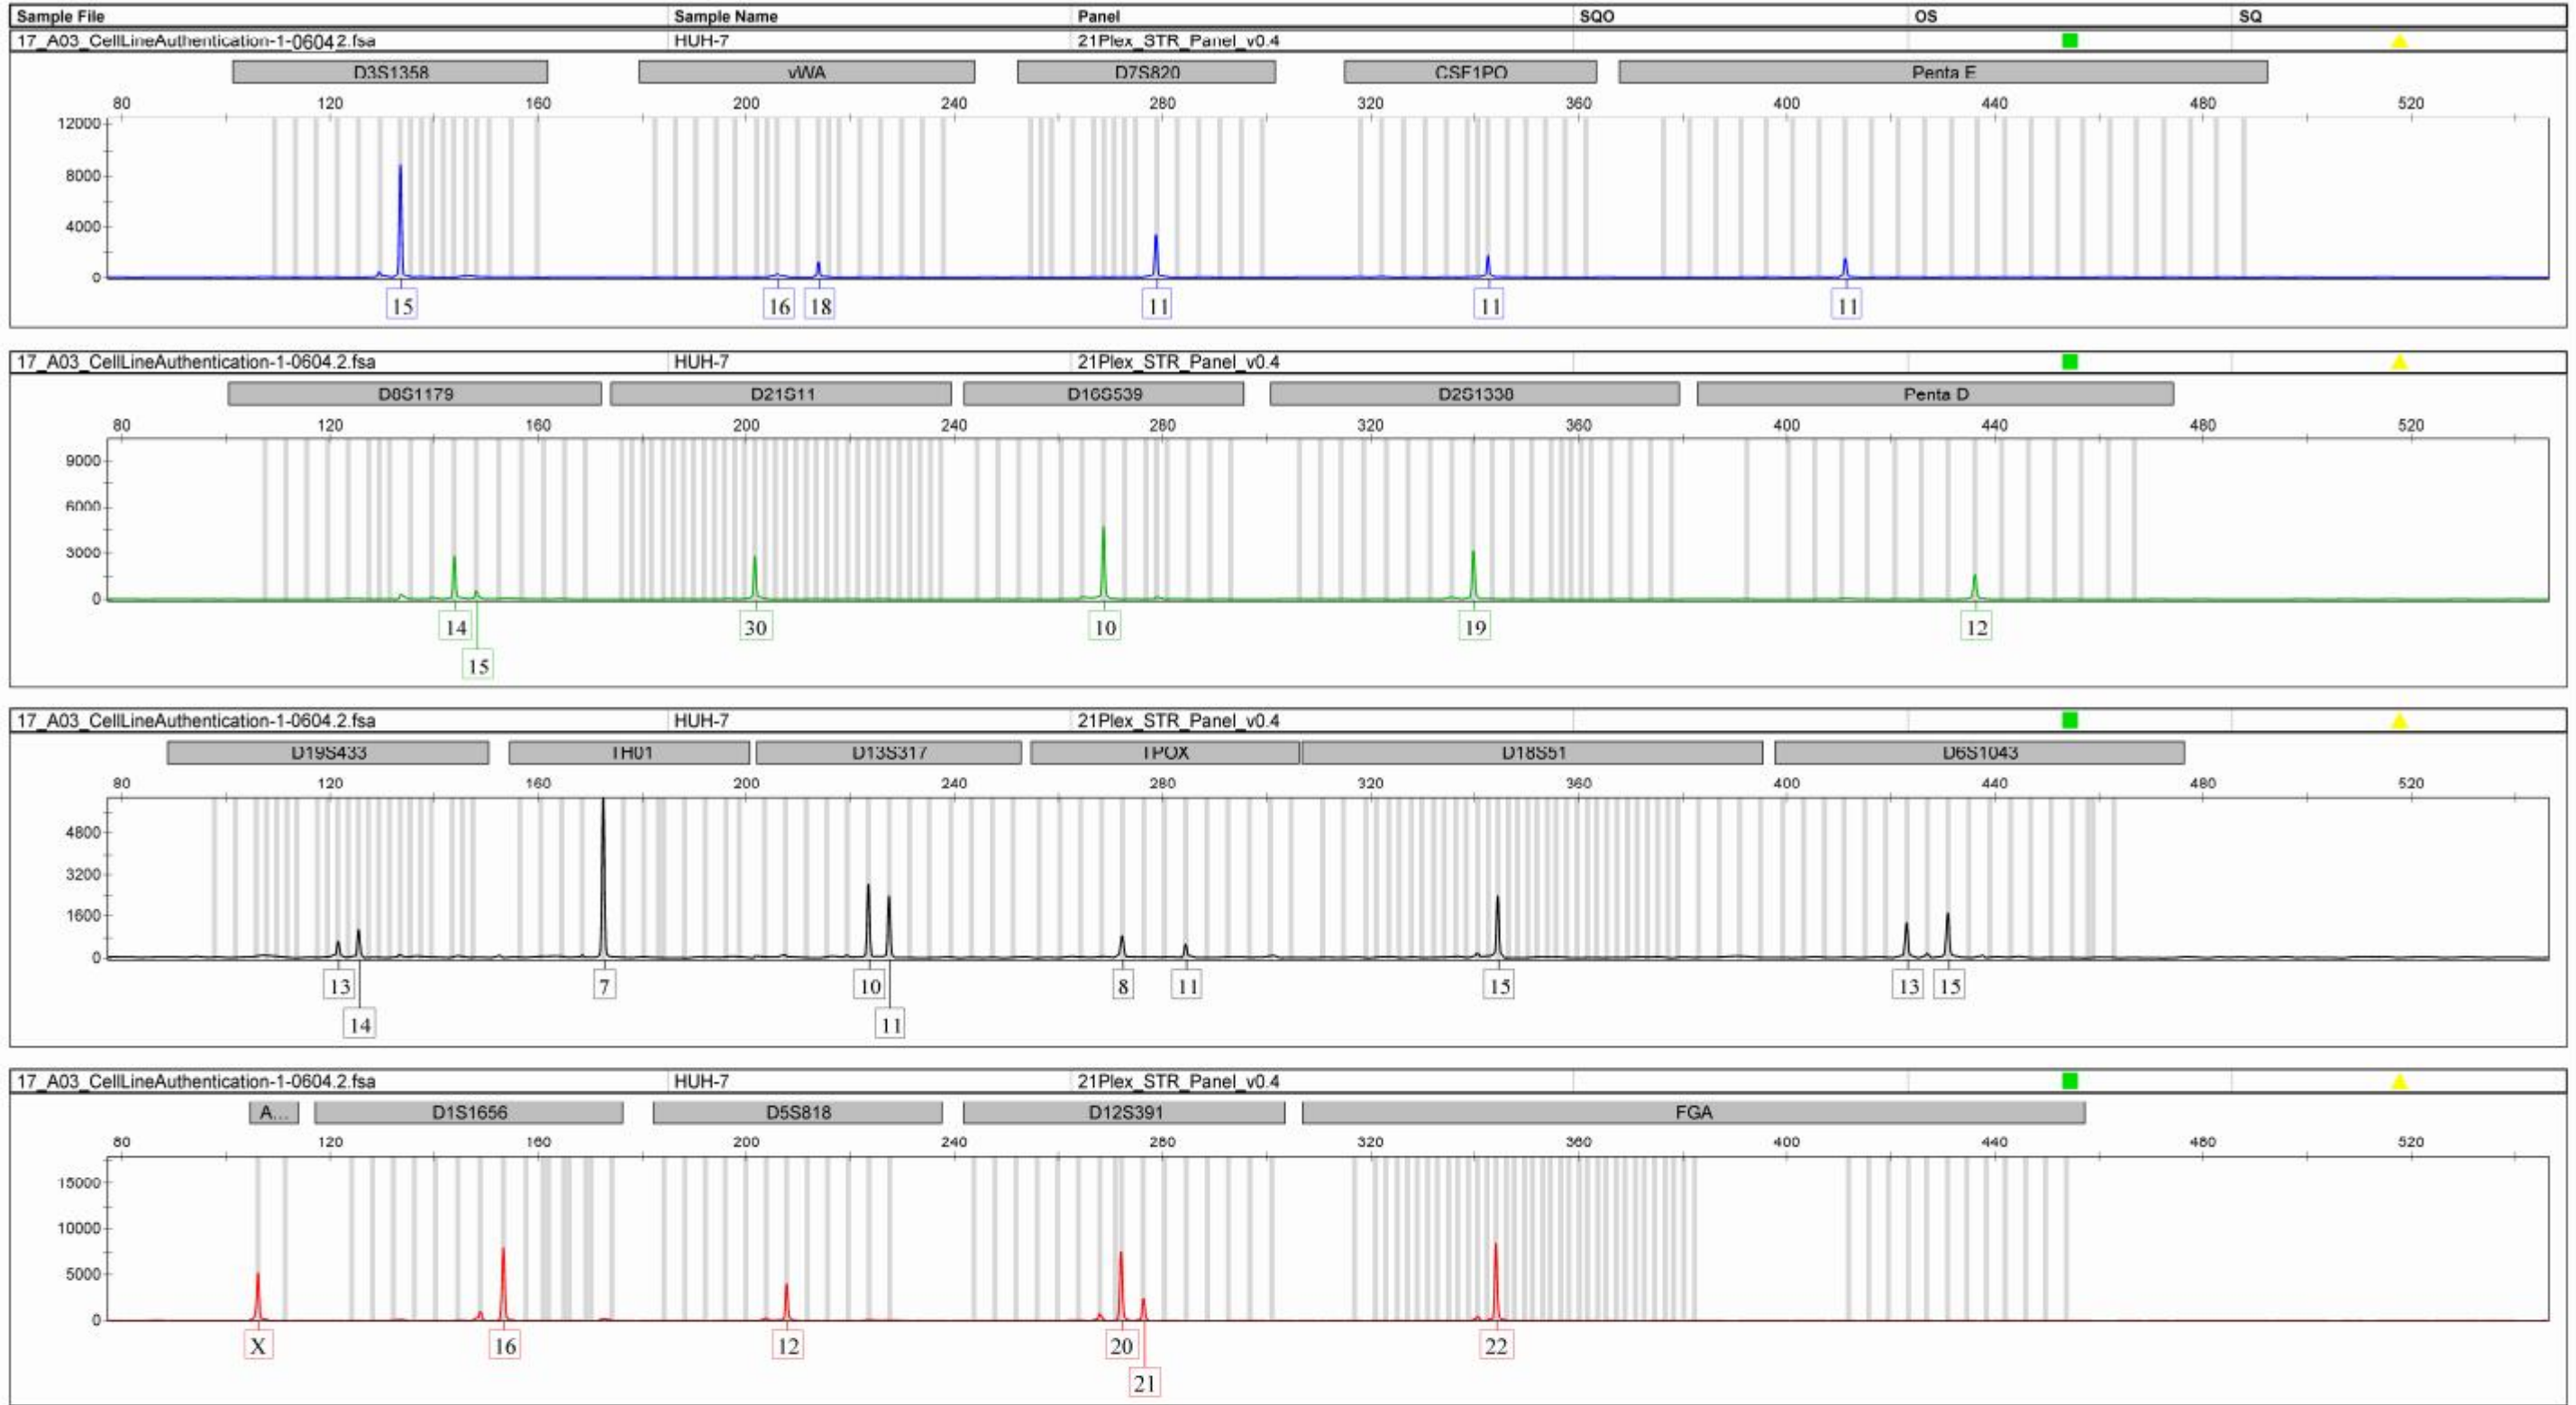

# Cell Line Authentication Report

Institution: Cobioer Biosciences CO.,LTD Vendor: Cobioer Biosciences CO.,LTD

Customer: Taohua Jiang

Attention: Taohua Jiang

Tel: 025-86880024

Tel: 025-86880024

Email: [jiangtaohua@cobioer.com](mailto:jiangtaohua@cobioer.com)

Email: [jiangtaohua@cobioer.com](mailto:jiangtaohua@cobioer.com)

## 1. Sample information:

Sample No.: “BEL7402”

## 2. Methods:

- Genomic DNA was extracted from the cell pellets provided by the customer.
- Samples, together with positive and negative control were amplified using GenePrint System (Promega).
- Amplified products were processed using the ABI3730xl Genetic Analyzer.
- Data was analyzed by GeneMapper4.0 software and then compared with the ATCC, DSMZ or JCRB databases for reference matching.

## 3. Results:

STR profile

| Marker  | Sample  |         |         |         | Database |         |         |
|---------|---------|---------|---------|---------|----------|---------|---------|
|         | Allele1 | Allele2 | Allele3 | Allele4 | Allele1  | Allele2 | Allele3 |
| D5S818  | 12      | 12      |         |         | 12       | 12      |         |
| D13S317 | 13.3    | 13.3    |         |         | 13.3     | 13.3    |         |
| D7S820  | 12      | 12      |         |         | 12       | 12      |         |
| D16S539 | 9       | 10      | 11      |         | 9        | 10      |         |
| VWA     | 16      | 18      |         |         | 16       | 18      |         |
| TH01    | 7       | 7       |         |         | 7        | 7       |         |
| AMEL    | X       | X       |         |         | X        | X       |         |
| TPOX    | 12      | 12      |         |         | 12       | 12      |         |
| CSF1PO  | 10      | 10      |         |         | 10       | 10      |         |
| D12S391 | 20      | 25      |         |         |          |         |         |
| FGA     | 18      | 21      |         |         |          |         |         |
| D2S1338 | 17      | 17      |         |         |          |         |         |
| D21S11  | 27      | 28      |         |         |          |         |         |
| D18S51  | 16      | 16      |         |         |          |         |         |
| D8S1179 | 12      | 12      |         |         |          |         |         |
| D3S1358 | 15      | 18      |         |         |          |         |         |
| D6S1043 | 18      | 18      |         |         |          |         |         |
| PENTAE  | 7       | 17      |         |         |          |         |         |
| D19S433 | 13      | 13      |         |         |          |         |         |
| PENTAD  | 8       | 15      |         |         |          |         |         |

## 4. Conclusion

- A. The STR results show that there are no four alleles on the main nine locus, there is certainly no cross contamination of human cells in this cell line.
- B. The match percent between the sample and the STR database profile is 100%, the cell name is BEL7402.
- C. STR profile was published: CCRID.

### Note:

1. The STR profile data was compared with the ATCC, DSMZ or JCRB databases, if the cell line is not included in the three institutions, the results are not correct. More information you provided would be useful for Cell Line Authentication.
2. Based on the ANSI Standard, cell lines with 100% match are considered to be “identical”; cell lines with  $\geq 80\%$  but less than 100% match are considered to be “related”.

Operator: Xiaomei Liu, Qin Wang

Leader: Wei Zhou

Date: 2020-02-13
